# Supplementary material for: The Hippo Pathway Regulates Homeostatic Growth of Stem Cell Niche Precursors in the Drosophila Ovary
Source: PubMed Central journal article supplement (PMC4333732; doi:10.1371/journal.pgen.1004962), 2015-02-02
Supplement: pgen.1004962.s009.pdf [file pgen.1004962.s009.pdf]

Supporting Table S1

| Genotype                                    | TFC Number |      |         |         |        | TF Number |     |         |         |        | n  |
|---------------------------------------------|------------|------|---------|---------|--------|-----------|-----|---------|---------|--------|----|
|                                             | TFC#       | SD   | vs RNAi | vs GAL4 | vs Sib | TF #      | SD  | vs RNAi | vs GAL4 | vs Sib |    |
| <i>Controls</i>                             |            |      |         |         |        |           |     |         |         |        |    |
| <i>bab:GAL4 (bab)</i>                       | 143.6      | 23.0 |         |         |        | 19.1      | 2.9 |         |         |        | 10 |
| <i>tj:GAL4 (tj)</i>                         | 148.0      | 16.8 |         |         |        | 19.5      | 2.6 |         |         |        | 10 |
| <i>nos:GAL4 (nos)</i>                       | 156.8      | 22.4 |         |         |        | 22.5      | 2.6 |         |         |        | 10 |
| <i>UAS-hpo<sup>RNAi</sup></i>               | 169.9      | 13.5 |         |         |        | 22.2      | 1.9 |         |         |        | 10 |
| <i>UAS-wts<sup>RNAi</sup></i>               | 157.1      | 15.1 |         |         |        | 20.9      | 2.0 |         |         |        | 10 |
| <i>UAS-yki<sup>RNAi</sup></i>               | 153.5      | 14.8 |         |         |        | 21.3      | 2.2 |         |         |        | 10 |
| <i>Experimental</i>                         |            |      |         |         |        |           |     |         |         |        |    |
| <i>bab&gt;&gt;hpo<sup>RNAi</sup></i>        | 201.8      | 21.9 | <0.01   | <0.01   |        | 25.8      | 2.2 | <0.01   | <0.01   |        | 10 |
| <i>bab&gt;&gt;wts<sup>RNAi</sup></i>        | 188.6      | 15.8 | <0.01   | <0.01   |        | 24.9      | 1.9 | <0.01   | <0.01   |        | 10 |
| <i>bab&gt;&gt;yki<sup>RNAi</sup></i>        | 124.2      | 11.8 | <0.01   | 0.02    |        | 18.3      | 1.3 |         |         | 0.01   | 10 |
| <i>tj&gt;&gt;hpo<sup>RNAi</sup></i>         | 186.7      | 15.3 | 0.02    | <0.01   |        | 25.5      | 2.0 | <0.01   | <0.01   |        | 10 |
| <i>tj&gt;&gt;wts<sup>RNAi</sup></i>         | 188.3      | 31.6 | 0.01    | <0.01   |        | 23.6      | 3.7 | 0.04    | 0.01    |        | 10 |
| <i>tj&gt;&gt;yki<sup>RNAi</sup></i>         | 126.5      | 24.3 | <0.01   | 0.03    |        | 17.1      | 3.0 | <0.01   | 0.07    |        | 10 |
| <i>tj&gt;&gt;UAS-yki</i>                    | 183.0      | 28.2 |         |         | 0.04   | 26.0      | 4.4 |         |         | <0.01  | 10 |
| <i>tj&gt;&gt;UAS-yki Sib</i>                | 156.5      | 24.5 |         |         |        | 20.1      | 3.7 |         |         |        | 10 |
| <i>tj&gt;&gt;UAS-hpo</i>                    | 123.4      | 16.4 |         |         | 0.02   | 15.3      | 2.1 |         |         | 0.04   | 10 |
| <i>tj&gt;&gt;UAS-hpo Sib</i>                | 144.3      | 20.2 |         |         |        | 17.5      | 2.2 |         |         |        | 10 |
| <i>nos&gt;&gt;hpo<sup>RNAi</sup></i>        | 154.1      | 17.7 | 0.04    | 0.77    |        | 21.1      | 2.1 | 0.20    | 0.24    |        | 10 |
| <i>nos&gt;&gt;wts<sup>RNAi</sup></i>        | 169.8      | 33.5 | 0.29    | 0.32    |        | 22.6      | 4.3 | 0.21    | 0.95    |        | 10 |
| <i>nos&gt;&gt;yki<sup>RNAi</sup> (VDRC)</i> | 160.6      | 18.9 | 0.69    | 0.36    |        | 22.1      | 2.6 | 0.73    | 0.47    |        | 10 |
| <i>nos&gt;&gt;yki<sup>RNAi</sup> (TRIP)</i> | 152.6      | 24.5 |         |         | 0.65   | 20.9      | 3.2 |         |         | 0.19   | 10 |
| <i>nos&gt;&gt;yki<sup>RNAi</sup> Sib</i>    | 156.5      | 18.9 |         |         |        | 22.3      | 2.6 |         |         |        | 10 |
| <i>nos&gt;&gt;UAS-yki</i>                   | 148.9      | 17.1 |         |         | 0.37   | 21.2      | 2.4 |         |         | 0.02   | 10 |
| <i>nos&gt;&gt;UAS-yki Sib</i>               | 142.3      | 14.9 |         |         |        | 18.7      | 1.9 |         |         |        | 10 |
| <i>nos&gt;&gt;UAS-hpo</i>                   | 149.0      | 16.4 |         |         | 0.07   | 20.2      | 2.1 |         |         | <0.01  | 10 |
| <i>nos&gt;&gt;UAS-hpo Sib</i>               | 134.0      | 17.0 |         |         |        | 17.4      | 1.9 |         |         |        | 10 |
