# Supplementary material for: The Hippo Pathway Regulates Homeostatic Growth of Stem Cell Niche Precursors in the Drosophila Ovary
Source: PubMed Central journal article supplement (PMC4333732; doi:10.1371/journal.pgen.1004962), 2015-02-02
Supplement: pgen.1004962.s010.pdf [file pgen.1004962.s010.pdf]

## Supporting Table S2

| Genotype                  | Ovariole Number |     |            | TFC Number |      |            | IC Number |      |            | GC Number |      |            | n  |
|---------------------------|-----------------|-----|------------|------------|------|------------|-----------|------|------------|-----------|------|------------|----|
|                           | ON              | SD  | vs Control | TFC#       | SD   | vs Control | IC #      | SD   | vs Control | GC #      | SD   | vs Control |    |
| <i>Control</i>            |                 |     |            |            |      |            |           |      |            |           |      |            |    |
| Oregon R                  | 17.6            | 2.4 |            |            |      |            |           |      |            |           |      |            | 10 |
| <i>w<sup>1118</sup></i>   |                 |     |            | 137.8      | 14.6 |            | 358.2     | 49.3 |            | 147.5     | 14   |            | 10 |
| <i>Mutants</i>            |                 |     |            |            |      |            |           |      |            |           |      |            |    |
| <i>ykl<sup>DBO2</sup></i> |                 |     |            | 155.1      | 19   | 0.06       | 515.5     | 75.8 | <0.01      | 212.3     | 97.3 | 0.05       | 6  |
| <i>ex<sup>1</sup></i>     | 21.3            | 5.4 | <0.01      | 185.4      | 18.9 | <0.01      | 577.1     | 112  | <0.01      | 200.8     | 56   | <0.01      | 10 |
