# Supplementary material for: The Hippo Pathway Regulates Homeostatic Growth of Stem Cell Niche Precursors in the Drosophila Ovary
Source: PubMed Central journal article supplement (PMC4333732; doi:10.1371/journal.pgen.1004962), 2015-02-02
Supplement: pgen.1004962.s011.pdf [file pgen.1004962.s011.pdf]

Supporting Table S3

| Genotype                                   | IC Number |       |         |         |        | GC Number |      |         |         |        | n  |
|--------------------------------------------|-----------|-------|---------|---------|--------|-----------|------|---------|---------|--------|----|
|                                            | IC #      | SD    | vs RNAi | vs GAL4 | vs Sib | GC #      | SD   | vs RNAi | vs GAL4 | vs Sib |    |
| <b>Controls</b>                            |           |       |         |         |        |           |      |         |         |        |    |
| <i>bab:GAL4 (bab)</i>                      | 528.8     | 63.2  |         |         |        | 223.4     | 59.0 |         |         |        | 10 |
| <i>tj:GAL4 (tj)</i>                        | 466.7     | 124.9 |         |         |        | 140.7     | 23.7 |         |         |        | 10 |
| <i>nos:GAL4 (nos)</i>                      | 526.7     | 120.8 |         |         |        | 167.2     | 32.8 |         |         |        | 10 |
| <i>UAS-hpo<sup>RNAi</sup></i>              | 477.2     | 123.4 |         |         |        | 218.8     | 40.7 |         |         |        | 10 |
| <i>UAS-wts<sup>RNAi</sup></i>              | 543.6     | 79.0  |         |         |        | 187.9     | 43.8 |         |         |        | 10 |
| <i>UAS-yki<sup>RNAi</sup> (VDRC)</i>       | 470.0     | 49.6  |         |         |        | 226.1     | 67.1 |         |         |        | 10 |
| <i>UAS-ex<sup>RNAi</sup></i>               | n/a       |       |         |         |        | 188.2     | 23.2 |         |         |        | 10 |
| <i>UAS-hipk<sup>RNAi</sup></i>             | n/a       |       |         |         |        | 228.3     | 26.7 |         |         |        | 10 |
| <i>UAS-sd<sup>RNAi</sup></i>               | n/a       |       |         |         |        | 216.4     | 46.2 |         |         |        | 9  |
| <b>Experimental</b>                        |           |       |         |         |        |           |      |         |         |        |    |
| <i>bab x hpo<sup>RNAi</sup></i>            | 625.2     | 157.5 | 0.03    | 0.09    |        | 298.4     | 44.3 | <0.01   | <0.01   |        | 10 |
| <i>bab x wts<sup>RNAi</sup></i>            | 638.4     | 119.8 | 0.02    | 0.05    |        | 265.8     | 49.8 | <0.01   | 0.09    |        | 10 |
| <i>bab x yki<sup>RNAi</sup> (VDRC)</i>     | 266.8     | 74.9  |         |         | <0.01  | 211.5     | 38.4 |         |         | 0.76   | 10 |
| <i>bab x yki<sup>RNAi</sup> Sib</i>        | 462.7     | 41.0  |         |         |        | 207.5     | 17.7 |         |         |        | 10 |
| <i>tj x hpo<sup>RNAi</sup></i>             | 818.2     | 124.5 | <0.01   | <0.01   |        | 267.2     | 24.3 | <0.01   | <0.01   |        | 10 |
| <i>tj x wts<sup>RNAi</sup></i>             | 796.1     | 168.0 | <0.01   | <0.01   |        | 271.5     | 57.9 | <0.01   | <0.01   |        | 10 |
| <i>tj x yki<sup>RNAi</sup> (VDRC)</i>      | 322.5     | 83.6  | <0.01   | <0.01   |        | 157.7     | 43.2 | <0.01   | 0.28    |        | 10 |
| <i>tj x UAS-yki</i>                        | 1186.9    | 382.7 |         |         | <0.01  | 329.5     | 23.7 |         |         | 0.047  | 10 |
| <i>tj x UAS-yki Sib</i>                    | 477.7     | 111.2 |         |         |        | 275.1     | 77.4 |         |         |        | 10 |
| <i>tj x UAS-hpo</i>                        | 301.6     | 40.8  |         |         | <0.01  | 166.6     | 35.3 |         |         | 0.04   | 10 |
| <i>tj x UAS-hpo Sib</i>                    | 505.7     | 125.7 |         |         |        | 219.4     | 65.3 |         |         |        | 10 |
| <i>nos x hpo<sup>RNAi</sup></i>            | 609.7     | 95.5  | 0.01    | 0.11    |        | 193.9     | 39.4 | 0.18    | 0.11    |        | 10 |
| <i>nos x wts<sup>RNAi</sup></i>            | 573.4     | 123.1 | 0.53    | 0.40    |        | 202.8     | 36.8 | 0.42    | 0.03    |        | 10 |
| <i>nos x yki<sup>RNAi</sup> (VDRC)</i>     | 477.6     | 86.1  | 0.81    | 0.31    |        | 136.5     | 33.3 | <0.01   | 0.05    |        | 10 |
| <i>nos x yki<sup>RNAi</sup> (TRIP)</i>     | 424.0     | 108.0 |         |         | 0.47   | 120.5     | 15.0 |         |         | <0.01  | 10 |
| <i>nos x UAS-yki</i>                       | 495.0     | 108.5 |         |         | <0.01  | 315.7     | 97.7 |         |         | <0.01  | 10 |
| <i>nos x UAS-yki Sib</i>                   | 353.6     | 86.5  |         |         |        | 167.0     | 34.9 |         |         |        | 10 |
| <i>nos x UAS-hpo</i>                       | 492.5     | 94.4  |         |         | 0.53   | 97.9      | 14.2 |         |         | <0.01  | 10 |
| <i>nos x UAS-hpo Sib</i>                   | 517.6     | 81.1  |         |         |        | 206.5     | 31.0 |         |         |        | 10 |
| <i>Nos x UAS-YkiS168A</i>                  |           |       |         |         |        | /239,1    | 91.6 | n/a     | 0.03    |        | 8  |
| <i>nos x ex<sup>RNAi</sup></i>             | n/a       |       |         |         |        | 176.1     | 29.8 | 0.32    | 0.53    |        | 10 |
| <i>nos x hipk<sup>RNAi</sup></i>           | n/a       |       |         |         |        | 181.9     | 37.8 | <0.01   |         |        | 10 |
| <i>nos x sd<sup>RNAi</sup></i>             | n/a       |       |         |         |        | 132.1     | 18.8 | <0.01   | <0.01   |        | 10 |
| <i>nos x hpo/wts/ex<sup>RNAi</sup></i>     | n/a       |       |         |         |        | 237.1     | 41.6 |         |         |        | 10 |
| <i>nos x hpo/wts/ex<sup>RNAi</sup> Sib</i> | n/a       |       |         |         |        | 239.2     | 33.0 |         |         |        | 9  |
