# Supplementary material for: The Hippo Pathway Regulates Homeostatic Growth of Stem Cell Niche Precursors in the Drosophila Ovary
Source: PubMed Central journal article supplement (PMC4333732; doi:10.1371/journal.pgen.1004962), 2015-02-02
Supplement: pgen.1004962.s012.pdf [file pgen.1004962.s012.pdf]

Supporting Table S4

| Genotype                                                          | TFC Number |      |       |                   | IC Number |       |       |                   | GC Number |      |       |                   | n  |
|-------------------------------------------------------------------|------------|------|-------|-------------------|-----------|-------|-------|-------------------|-----------|------|-------|-------------------|----|
|                                                                   | TFC#       | SD   | vs WT | vs <i>hpo</i> sib | IC #      | SD    | vs WT | vs <i>hpo</i> sib | GC #      | SD   | vs WT | vs <i>hpo</i> sib |    |
| <b>EGF pathway</b>                                                |            |      |       |                   |           |       |       |                   |           |      |       |                   |    |
| WT control:<br><i>spi<sup>RNAi</sup>/+; hpo<sup>RNAi</sup>/+</i>  | 127.9      | 16.9 |       |                   | 432.4     | 100.3 |       |                   | 164.5     | 23.2 |       |                   | 10 |
| <i>tjGAL4/+; hpo<sup>RNAi</sup>/+ [egfr<sup>RNAi</sup> cross]</i> | 151.0      | 15.0 | <0.01 |                   | 709.8     | 144.6 | <0.01 |                   | 237.5     | 92.1 | 0.03  |                   | 10 |
| <i>tjGAL4/egfr<sup>RNAi</sup>; hpo<sup>RNAi</sup>/+</i>           | 153.3      | 12.1 | <0.01 | 0.72              | 577.7     | 87.8  | <0.01 | 0.03              | 161.6     | 30.8 | 0.82  | 0.03              | 9  |
| <i>tjGAL4/egfr<sup>RNAi</sup>; +</i>                              | 131.9      | 11.4 | 0.54  | <0.01             | 396.5     | 70.1  | 0.36  | <0.01             | 205.8     | 55.8 | 0.04  | 0.36              | 10 |
| <i>tjGAL4/+; hpo<sup>RNAi</sup>/+ [spi<sup>RNAi</sup> cross]</i>  | 165.4      | 21.8 | <0.01 |                   | 688.1     | 91.1  | <0.01 |                   | 245.0     | 32.7 | <0.01 |                   | 9  |
| <i>tjGAL4/spi<sup>RNAi</sup>; hpo<sup>RNAi</sup>/+</i>            | 171.3      | 16.9 | <0.01 | 0.50              | 632.3     | 103.0 | <0.01 | 0.24              | 185.6     | 79.6 | 0.43  | 0.05              | 9  |
| <i>tjGAL4/spi<sup>RNAi</sup>; +</i>                               | 137.2      | 9.2  | 0.14  | <0.01             | 447.1     | 76.6  | 0.72  | <0.01             | 185.2     | 29.9 | 0.10  | <0.01             | 10 |
| <b>JAK/STAT pathway</b>                                           |            |      |       |                   |           |       |       |                   |           |      |       |                   |    |
| WT control:<br><i>upd1<sup>RNAi</sup>/+; hpo<sup>RNAi</sup>/+</i> | 134.9      | 13.8 |       |                   | 418.9     | 87.4  |       |                   | 163.9     | 22.3 |       |                   | 9  |
| <i>tjGAL4/+; hpo<sup>RNAi</sup>/+ [dome<sup>RNAi</sup> cross]</i> | 162.5      | 26.3 | <0.01 |                   | 680.1     | 110.4 | <0.01 |                   | 293.9     | 55.9 | <0.01 |                   | 9  |
| <i>tjGAL4/dome<sup>RNAi</sup>; hpo<sup>RNAi</sup>/+</i>           | 138.4      | 19.6 | 0.64  | 0.04              | 516.3     | 111.1 | 0.05  | <0.01             | 154.7     | 36.6 | 0.52  | <0.01             | 10 |
| <i>tjGAL4/dome<sup>RNAi</sup>; +</i>                              | 114.4      | 12.1 | <0.01 | <0.01             | 363.0     | 31.9  | 0.07  | <0.01             | 157.6     | 30.9 | 0.85  | <0.01             | 10 |
| <i>tjGAL4/+; hpo<sup>RNAi</sup>/+ [upd1<sup>RNAi</sup> cross]</i> | 155.2      | 24.4 | <0.01 |                   | 783.9     | 174.3 | 0.03  |                   | 200.6     | 42.4 | <0.01 |                   | 9  |
| <i>tjGAL4/upd1<sup>RNAi</sup>; hpo<sup>RNAi</sup>/+</i>           | 163.6      | 31.7 | <0.01 | 0.51              | 613.1     | 33.2  | <0.01 | <0.01             | 146.8     | 32.1 | 0.20  | <0.01             | 9  |
| <i>tjGAL4/upd1<sup>RNAi</sup>; +</i>                              | 136.4      | 16.1 | 0.82  | 0.07              | 396.6     | 105.1 | 0.63  | <0.01             | 171.2     | 23.9 | 0.51  | 0.09              | 9  |
