# Supplementary material for: The Hippo Pathway Regulates Homeostatic Growth of Stem Cell Niche Precursors in the Drosophila Ovary
Source: PubMed Central journal article supplement (PMC4333732; doi:10.1371/journal.pgen.1004962), 2015-02-02
Supplement: pgen.1004962.s013.pdf [file pgen.1004962.s013.pdf]

**Supporting Table S5**

| Genotype                        | TFC Number |      |         |         | TF Number |     |         |         | IC Number |       |         |         | n  |
|---------------------------------|------------|------|---------|---------|-----------|-----|---------|---------|-----------|-------|---------|---------|----|
|                                 | TFC#       | SD   | vs RNAi | vs GAL4 | TF #      | SD  | vs RNAi | vs GAL4 | IC #      | SD    | vs RNAi | vs GAL4 |    |
| <i>Controls</i>                 |            |      |         |         |           |     |         |         |           |       |         |         |    |
| <i>ptc:GAL4</i>                 | 145.8      | 18.9 |         |         | 19.5      | 2.1 |         |         | 624.0     | 67.6  |         |         | 10 |
| <i>hh:GAL4</i>                  | 137.5      | 20.8 |         |         | 18.1      | 2.3 |         |         | 568.6     | 95.8  |         |         | 10 |
| <i>UAS-hpo<sup>RNAi</sup></i>   | 169.9      | 13.5 |         |         | 22.2      | 1.9 |         |         | 477.2     | 123.4 |         |         | 10 |
| <i>UAS-wts<sup>RNAi</sup></i>   | 158.7      | 17.1 |         |         | 20.7      | 1.9 |         |         | 543.6     | 79.0  |         |         | 10 |
| <i>Experimental</i>             |            |      |         |         |           |     |         |         |           |       |         |         |    |
| <i>ptc x hpo<sup>RNAi</sup></i> | 145        | 10.0 | <0.01   | 0.90    | 18.6      | 1.1 | <0.01   | 0.24    | 586.8     | 83.8  | 0.30    | 0.03    | 10 |
| <i>ptc x wts<sup>RNAi</sup></i> | 142.9      | 18.4 | 0.06    | 0.76    | 18.7      | 2.7 | 0.07    | 0.49    | 667.1     | 75.5  | 0.20    | <0.01   | 10 |
| <i>hh x hpo<sup>RNAi</sup></i>  | 166.2      | 19.3 | 0.01    | 0.63    | 21.9      | 3.1 | 0.01    | 0.80    | 577.5     | 122.7 | 0.08    | 0.87    | 10 |
| <i>hh x wts<sup>RNAi</sup></i>  | 165.56     | 12.9 | <0.01   | 0.37    | 20.7      | 1.9 | 0.02    | 1.00    | 486.1     | 123.7 | 0.17    | 0.23    | 10 |
