# Supplementary material for: The Hippo Pathway Regulates Homeostatic Growth of Stem Cell Niche Precursors in the Drosophila Ovary
Source: PubMed Central journal article supplement (PMC4333732; doi:10.1371/journal.pgen.1004962), 2015-02-02
Supplement: pgen.1004962.s014.pdf [file pgen.1004962.s014.pdf]

## Supporting Table S6

| Single RNAi Genotype                   | GC-IC Proportion |     |         |                |
|----------------------------------------|------------------|-----|---------|----------------|
|                                        | GC               | IC  | vs RNAi | vs GAL4 vs Sib |
| <b>Controls</b>                        |                  |     |         |                |
| <i>bab:GAL4 (bab)</i>                  | 29%              | 71% |         |                |
| <i>tj:GAL4 (tj)</i>                    | 23%              | 77% |         |                |
| <i>nos:GAL4 (nos)</i>                  |                  |     |         |                |
| <i>UAS-hpo<sup>RNAi</sup></i>          | 30%              | 70% |         |                |
| <i>UAS-wts<sup>RNAi</sup></i>          | 25%              | 75% |         |                |
| <i>UAS-yki<sup>RNAi</sup> (VDRC)</i>   | 30%              | 70% |         |                |
| <b>Experimental</b>                    |                  |     |         |                |
| <i>bab x hpo<sup>RNAi</sup></i>        | 32%              | 68% | 0.59    | 0.12           |
| <i>bab x wts<sup>RNAi</sup></i>        | 29%              | 70% | 0.09    | 0.86           |
| <i>bab x yki<sup>RNAi</sup> (VDRC)</i> | 45%              | 55% |         | <0.01          |
| <i>bab x yki<sup>RNAi</sup> Sib</i>    | 31%              | 69% |         |                |
| <i>tj x hpo<sup>RNAi</sup></i>         | 25%              | 75% | 0.03    | 0.37           |
| <i>tj x wts<sup>RNAi</sup></i>         | 25%              | 75% | 0.74    | 0.22           |
| <i>tj x yki<sup>RNAi</sup> (VDRC)</i>  | 33%              | 67% | 0.02    | <0.01          |
| <i>tj x UAS-yki</i>                    | 22%              | 78% |         | <0.01          |
| <i>tj x UAS-yki Sib</i>                | 35%              | 65% |         |                |
| <i>tj x UAS-hpo</i>                    | 35%              | 65% |         | <0.01          |
| <i>tj x UAS-hpo Sib</i>                | 30%              | 70% |         |                |

| Double RNAi Genotype                                           | GC-IC Proportion |     |       |            |
|----------------------------------------------------------------|------------------|-----|-------|------------|
|                                                                | GC               | IC  | vs WT | vs hpo Sib |
| <b>EGF pathway</b>                                             |                  |     |       |            |
| <i>WT control: spi<sup>RNAi/+</sup>; hpo<sup>RNAi/+</sup></i>  | 27%              | 73% |       |            |
| <i>tjGAL4/+;hpo<sup>RNAi/+</sup> [egfr cross]</i>              | 24%              | 76% | 0.10  |            |
| <i>tjGAL4/egfr<sup>RNAi/+</sup>;hpo<sup>RNAi/+</sup></i>       | 22%              | 78% | <0.01 | 0.18       |
| <i>tjGAL4/egfr<sup>RNAi/+</sup></i>                            | 33%              | 67% | <0.01 | <0.01      |
| <i>tjGAL4/+;hpo<sup>RNAi/+</sup> [spi cross]</i>               | 26%              | 74% | 0.51  |            |
| <i>tjGAL4/spi<sup>RNAi/+</sup>;hpo<sup>RNAi/+</sup></i>        | 20%              | 80% | <0.01 | <0.01      |
| <i>tjGAL4/spi<sup>RNAi/+</sup></i>                             | 29%              | 71% | 0.49  | 0.13       |
| <b>JAK/STAT pathway</b>                                        |                  |     |       |            |
| <i>WT control: upd1<sup>RNAi/+</sup>; hpo<sup>RNAi/+</sup></i> | 28%              | 72% |       |            |
| <i>tjGAL4/+;hpo<sup>RNAi/+</sup> [dome cross]</i>              | 30%              | 70% | 0.48  |            |
| <i>tjGAL4/dome<sup>RNAi/+</sup>;hpo<sup>RNAi/+</sup></i>       | 23%              | 77% | <0.01 | <0.01      |
| <i>tjGAL4/dome<sup>RNAi/+</sup></i>                            | 30%              | 70% | 0.16  | 0.81       |
| <i>tjGAL4/+; hpo<sup>RNAi/+</sup> [upd1 cross]</i>             | 21%              | 79% | <0.01 |            |
| <i>tjGAL4/upd1<sup>RNAi/+</sup>; hpo<sup>RNAi/+</sup></i>      | 19%              | 81% | <0.01 | 0.12       |
| <i>tjGAL4/upd1<sup>RNAi/+</sup></i>                            | 30%              | 70% | 0.32  | <0.01      |
